# Supplementary material for: Developmental and molecular contributions to contextual fear memory emergence in mice
Source: PubMed Central journal article supplement (PMC11251045; doi:10.1038/s41386-024-01835-0), 2024-03-05
Supplement: 41386_2024_1835_MOESM1_ESM.pdf [file 41386_2024_1835_MOESM1_ESM.pdf]

## SUPPLEMENTAL MATERIALS

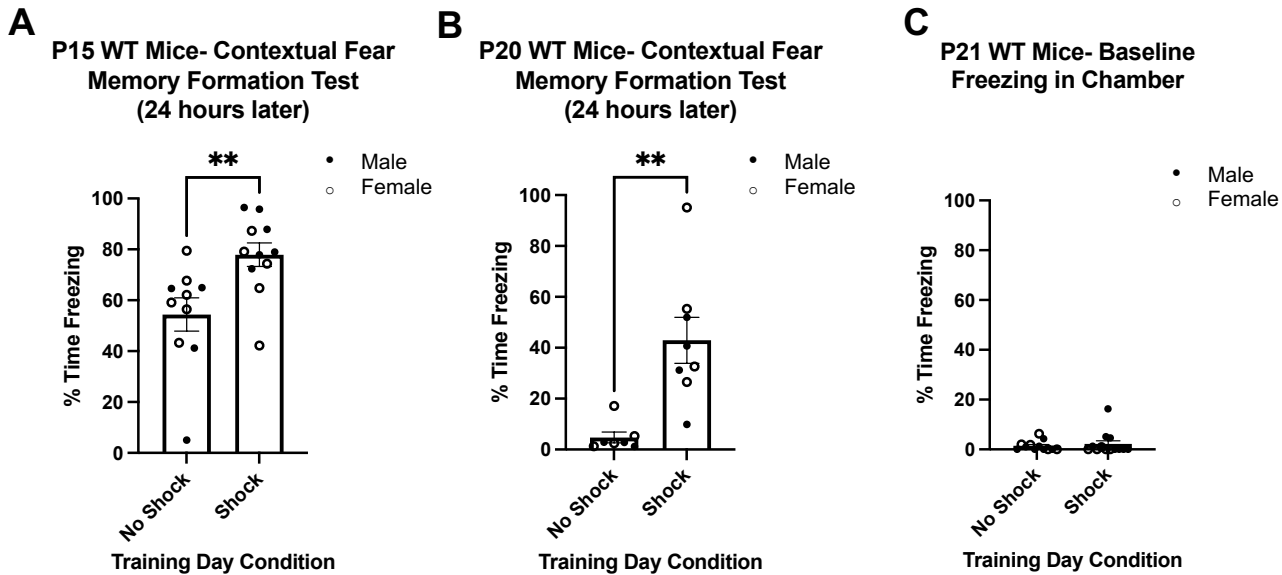

**Fig. S1: P15 and P20 WT mice exhibit contextual fear memory formation capabilities, and P21 mice exhibit no baseline freezing differences.**

**A** Quantification of the percentage time freezing on testing day of No Shock ( $n = 10$ ) and Shock ( $n = 11$ ) mice trained on P15 and tested 1 d later. The Shock group exhibited significantly more freezing than the No Shock group ( $**p < .01$ ). **B** Quantification of the percentage time freezing on testing day of No Shock ( $n = 7$ ) and Shock ( $n = 8$ ) mice trained on P20 and tested 1 d later. The Shock group exhibited significantly more freezing than No Shock ( $**p < .01$ ). **C** Quantification of the percentage time freezing during the initial 2-min exposure to the chamber on training day and prior to any shocks administered (baseline freezing) on P21 (No Shock group:  $n = 12$ ; Shock group:  $n = 13$ ). There were no significant differences found in freezing responses between the two groups ( $p = .3571$ ).

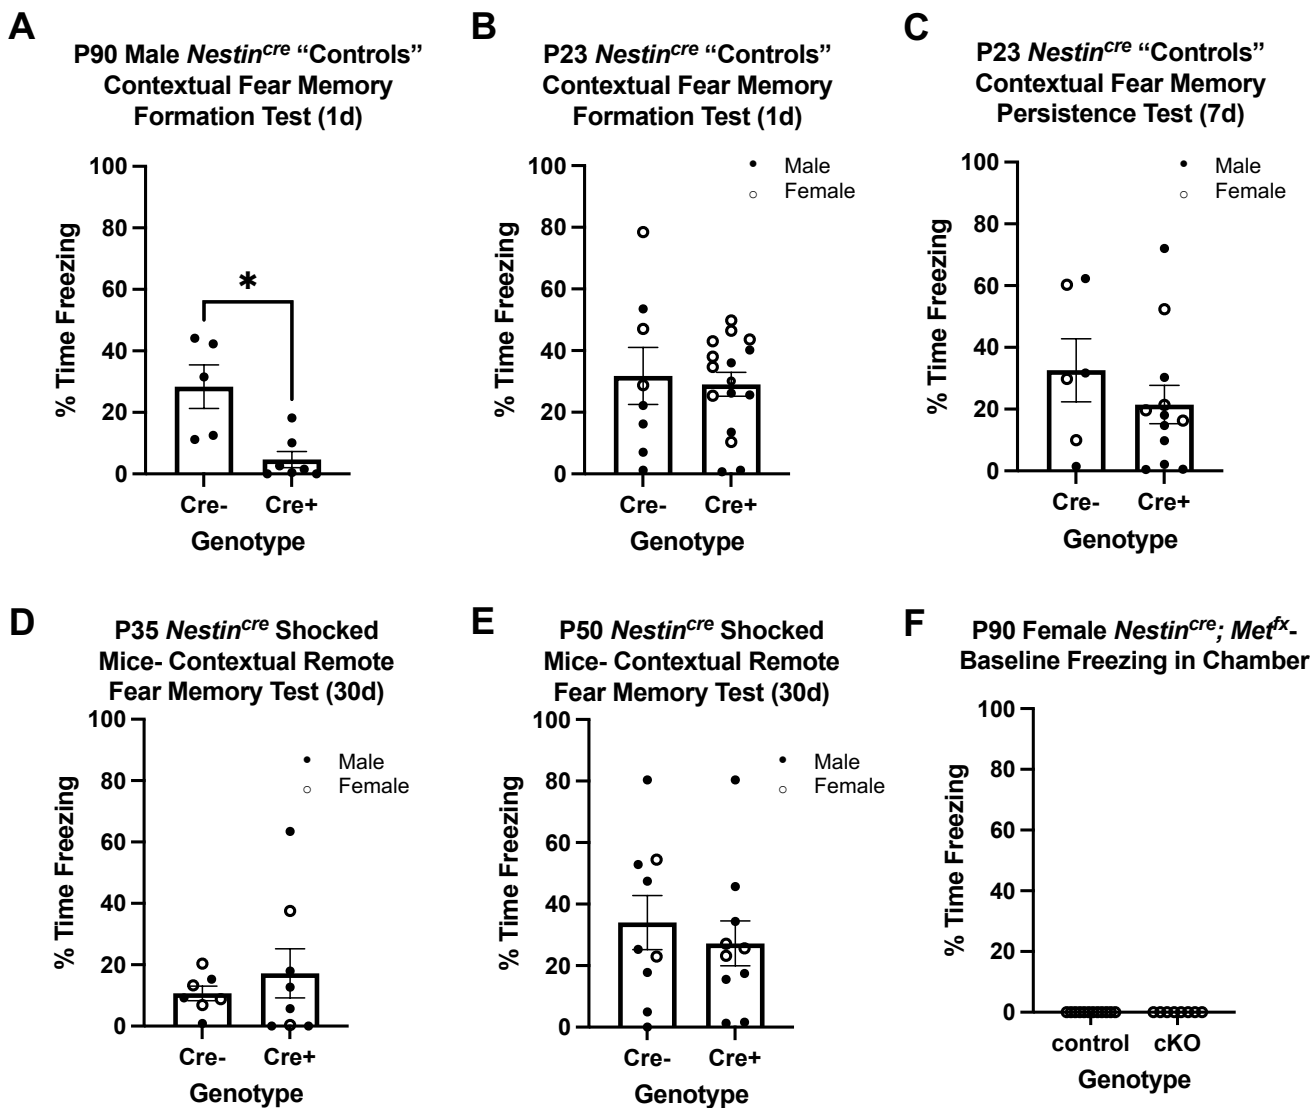

**Fig. S2:** There are no genotype differences in control *Nestin<sup>Cre</sup>* mice during development, unlike in males in adulthood. There is no baseline freezing in P90 females. Quantification of the percentage time freezing on testing day between Cre- and Cre+, control mice. **A** Cre+ control male mice (n = 7) trained on P90 and tested 1 d later exhibit significantly less freezing ( $p = .0152$ ) than Cre- control male mice (n = 5). No significant differences were determined during development: **B** Trained on P23 and tested 1 d later ( $p = .7501$ ; Cre-: n = 8; Cre+: n = 16) **C** Trained on P23 and tested 7 d later ( $p = .4680$ ; Cre-: n = 6; Cre+: n = 12) **D** Trained on P35 and tested 30 d later ( $p = .5077$ ; Cre-: n = 7; Cre+: n = 8) or **E** Trained on P50 and tested 30 d later ( $p = .6277$ ; Cre-: n = 9; Cre+: n = 10). **F** There is no baseline freezing on conditioning day in P90 female control (n = 12) or cKO (n = 8) mice.
